# Supplementary material for: Synthesis and thermolysis of novel spiroselenuranes bearing two oxaselenetane rings: double oxirane formation reactions from 1,5-dioxa-4λ4-selenaspiro[3.3]heptanes
Source: Royal Society of Chemistry journal article supplement (doi:10.1039/b009789f), 2001-01-01
Supplement: b009789f.doc [file b009789f.doc]

**Supporting Information for the Communication Entitled**

**Synthesis and Thermolysis of Novel Spiroselenuranes Bearing Two Oxaselenetane Rings: Double Oxirane Formation Reactions**

**from 1,5-Dioxa-44-selenaspiro[3.3]heptanes**

Fumihiko Ohno, Takayuki Kawashima,* and Renji Okazaki*

*Department of Chemistry, Graduate School of Science, The University of Tokyo*

*7-3-1 Hongo, Bunkyo-ku, Tokyo 113-0033, Japan*

*Tel(Fax): +81-3-5800-6899*

*E-mail: takayuki@chem.s.u-tokyo.ac.jp*

**Experimental**

**General Procedure.** All melting points are uncorrected. All solvents used in the reactions were purified by the reported methods. THF was purified by distillation from diphenylketyl under argon before use. All reactions were carried out under argon atmosphere unless otherwise noted. Preparative gel permeation liquid chromatography (GPLC) was performed by LC-908 with JAIGEL 1H+2H columns (Japan Analytical Industry) with chloroform or toluene as solvent. Wet column chromatography (WCC) was performed with Wakogel C-200. Dry column chromatography (dry CC) was performed with ICN silica DCC 60A. Flash column chromatography (FCC) was performed with silica gel BW 300 (Fuji Davison Chemical) or silica gel 60 (Merck). The 1H NMR (500 MHz or 270 MHz) and 13C NMR (126 MHz or 67.8 MHz) spectra were measured with a Bruker AM-500 or a JEOL EX-270 spectrometer, respectively, in CDCl3 or C6D6 using tetramethylsilane (TMS) as internal standard; the coupling constants (*J*HSe, *J*CSe) were obtained from the satellite peaks. The 19F NMR (254 MHz) spectra were taken with a JEOL EX-270 spectrometer using Fleon® as external standard. The 77Se NMR (95 MHz or 51.5 MHz) spectra were taken with a JEOL 500 or a JEOL EX-270 spectrometer, respectively, using dimethyl selenide as external standard. Mass spectra were recorded with a JEOL JMX-SX102 or SHIMADZU QP-5000 mass spectrometer. Elemental analyses were performed by the Microanalytical Laboratory of the Department of Chemistry, Faculty of Science, The University of Tokyo.

**Synthesis of 3,7-Bis(phenylthio)-2,2,6,6-tetrakis(trifluoromethyl)-1,5-dioxa-44-selenaspiro[3.3]heptanes (*trans-trans*-8 and *trans-cis*-8)**

**Preparation of Bis[(phenylthio)methyl] Selenide (5).** To a THF suspension (28 mL) of Na2Se (32.0 mmol), which was prepared by the reported method (Thompson, D. P.; Boudjouk, P. *J. Org. Chem.* **1988**, *53*, 2109-2112) was added a THF solution of chloromethyl phenyl sulfide (8.57 mL, 64.0 mmol) at 0 _C and the reaction mixture was stirred for 12 h at 25 _C. The resulting precipitates were filtered off with Celite® and the filtrate was concentrated in vacuo. The residue was subjected to WCC (SiO2, hexane-CH2Cl2 (4:1)) to afford **5** (9.52 g, 91%). **5**: yellow viscous oil; 1H NMR (CDCl3, 270 MHz) 4.15 (s, 2*J*HSe = 16 Hz, 4H, C*H*2), 7.23–7.34 (m, 6H), 7.36–7.42 (m, 4H); 13C{1H} NMR (CDCl3, 67.8 MHz) 27.04 (s, *C*H2), 126.95 (s), 128.98 (s), 130.13 (s), 135.60 (s); 77Se NMR (CDCl3, 51.5 MHz) 308.7 (s). HRMS (70 eV) *m/z* calcd for C14H14S280Se 325.9702, found 325.9732.

**Preparation of (Phenylthio)methyl 3,3,3-Trifluoro-2-hydroxy-1-(phenyl-thio)-2-(trifluoromethyl)propyl Selenide (6).** To a solution of **5** (7.45 g, 22.9 mmol) in THF (350 mL) was added a THF solution of lithium diisopropylamide (LDA) (49.4 mL, 25.2 mmol) at –78 _C and the reaction mixture was stirred for 10 min. To the yellow solution was added at –78 _C under dry nitrogen excess of hexafluoroacetone (HFA), which was freshly prepared by adding its trihydrate (7.3 mL, 52.9 mmol) to concentrated sulfuric acid at 140 _C. The orange solution was stirred for 30 min, treated with aqueous NH4Cl, and extracted with CH2Cl2. The extracts were dried over anhydrous MgSO4. After removal of the solvent under reduced pressure the residue was subjected to WCC (SiO2, hexane-CH2Cl2 (3:1)), and was purified by GPLC (chloroform) to afford **6** (4.20 g, 28%), along with **5** and (PhSCH2Se)2 (7:2 mixture, 2.55 g). **6**: yellow viscous oil; 1H NMR (CDCl3, 500 MHz) 3.74 (d, 2*J*HH = 12 Hz, 1H, C*H*H'), 4.01 (d, 2*J*HH = 12 Hz, 1H, CH*H'*), 4.19 (s, 1H, O*H*), 4.96 (s, 1H, SeC*H*SPh), 7.25–7.32 (m, 5H), 7.32–7.37 (m, 3H), 7.53–7.56 (m, 2H); 13C{1H} NMR (CDCl3, 126 MHz) 30.94 (s, 1*J*CSe = 83 Hz, Se*C*H2), 51.58 (s, 1*J*CSe = 97 Hz, Se*C*H), 76.92 (sept, 2*J*CF = 29 Hz, *C*(CF3)2), 122.12 (q, 1*J*CF = 290 Hz, *C*F3), 122.33 (q, 1*J*CF = 289 Hz, *C*F3), 127.69 (s), 129.20 (s2), 129.67 (s), 130.72 (s), 133.03 (s), 133.64 (s), 133.89 (s); 19F NMR (CDCl3, 254 MHz) –72.4 (br s); 77Se NMR (CDCl3, 51.5 MHz) 394.9 (m). HRMS (70 eV) *m/z* calcd for C17H14F6OS280Se 491.9555, found 491.9552. Bis[(phenylthio)-methyl] diselenide: yellow viscous oil; 1H NMR (CDCl3, 270 MHz) 4.41 (s, 2*J*HSe = 12 Hz, 4H, SeC*H*2), 7.24-7.35 (m, 6H), 7.37-7.44 (m, 4H); 77Se NMR (CDCl3, 51.5 MHz) 409.6 (s).

**Preparation of Bis[3,3,3-trifluoro-2-hydroxy-1-(phenylthio)-2-(trifluoro-methyl)propyl] Selenides (*dl*-7 and *meso*-7).** To a solution of **6** (3.15 g, 6.40 mmol) in THF (40 mL) was added a THF solution of LDA (24.7 mL, 12.8 mmol) at –78 _C and the reaction mixture was stirred for 10 min. To the yellow solution was added at –78 _C under dry nitrogen excess of HFA, which was freshly prepared by adding its trihydrate (2.7 mL, 19.6 mmol) to concentrated sulfuric acid at 140 _C. The orange solution was stirred for 30 min, treated with aqueous NH4Cl and extracted with CH2Cl2. The extracts were dried over anhydrous MgSO4. After removal of the solvent under reduced pressure the residue was subjected to FCC (SiO2, CH2Cl2) to afford polar *dl*-**7** (300 mg, 7%) and less polar *meso*-**7** (2.56 g, 61%) along with recovered **6** (161 mg, 5%). *dl*-**7**: colorless plates (hexane); mp 114.8–115.7 _C; 1H NMR (CDCl3, 500 MHz) 4.13 (br s, 2H, O*H*), 4.71 (s, 2H, SeC*H*), 7.24–7.30 (m, 8H), 7.34 (t, 3*J* = 6.9 Hz, 2H); 1H NMR (C6D6, 500 MHz) 4.20 (br s, 2H, O*H*), 4.98 (s, 2H, SeC*H*), 6.80-6.87 (m, 4H), 6.87–6.91 (m, 2H), 7.22–7.42 (m, 4H); 13C{1H} NMR (CDCl3, 126 MHz) 52.47 (s, Se*C*H), 77.74 (sept, 2*J*CF = 29 Hz, *C*(CF3)2), 122.07 (q2, 1*J*CF = 289 Hz, *C*F3), 129.21 (s), 129.85 (s), 132.10 (s), 133.32 (s); 13C{1H} NMR (C6D6, 126 MHz) 52.31 (s, Se*C*H), 79.02 (sept, 2*J*CF = 29 Hz, *C*(CF3)2), 122.86 (q2, 1*J*CF = 289 Hz, *C*F3), 129.07 (s), 129.77 (s), 132.40 (s), 133.79 (s); 19F NMR (CDCl3, 254 MHz) –72.1~–72.3 (m); 19F NMR (C6D6, 254 MHz) –71.8 (q, 4*J*FF = 8.5 Hz, 6F), –72.6 (q, 4*J*FF = 8.5 Hz, 6F); 77Se NMR (CDCl3, 51.5 MHz) 521.1 (m). Anal Calcd for C20H14F12O2S2Se: C, 36.54; H, 2.15. Found: C, 36.35; H, 2.40. HRMS (70 eV) *m/z* calcd for C20H14F12O2S280Se 657.9409, found 657.9434. *meso*-**7**: colorless plates (hexane); mp 104.0–105.2 _C; 1H NMR (CDCl3, 500 MHz) 4.38 (br s, 2H, O*H*), 4.87 (s, 2H, SeC*H*), 7.27–7.32 (m, 4H), 7.34–7.38 (m, 6H); 1H NMR (C6D6, 500 MHz) 4.40 (br s, 2H, O*H*), 5.11 (s, 2H, SeC*H*), 6.87–6.95 (m, 6H), 7.31 (d, 3*J* = 7.3 Hz, 4H); 13C{1H} NMR (CDCl3, 126 MHz) 51.70 (s, 1*J*CSe = 103 Hz, Se*C*H), 78.17 (sept, 2*J*CF = 29 Hz, *C*(CF3)2), 122.12 (q, 1*J*CF = 289 Hz, *C*F3), 122.28 (q, 1*J*CF = 289 Hz, *C*F3), 129.22 (s), 129.52 (s), 132.87 (s), 133.04 (s); 13C{1H} NMR (C6D6, 126 MHz) 51.93 (s, Se*C*H), 79.08 (sept, 2*J*CF = 29 Hz, *C*(CF3)2), 122.90 (q, 1*J*CF = 289 Hz, *C*F3), 123.03 (q, 1*J*CF = 290 Hz, *C*F3), 129.08 (s), 129.53 (s), 133.14 (s), 133.57 (s); 19F NMR (CDCl3, 254 MHz) –71.7 (q, 4*J*FF = 8.3 Hz, 6F), –73.0 (q, 4*J*FF = 8.3 Hz, 6F); 19F NMR (C6D6, 254 MHz) –71.4 (q, 4*J*FF = 8.3 Hz, 6F), –73.0 (q, 4*J*FF = 8.3 Hz, 6F); 77Se NMR (CDCl3, 51.5 MHz) 521.7 (m). Anal. Calcd for C20H14F12O2S2Se: C, 36.54; H, 2.15. Found: C, 36.75; H, 2.15. HRMS (70 eV) *m/z* calcd for C20H14F12O2S280Se 657.9409, found 657.9436.

**Synthesis of *trans-trans*-8 and *trans-cis*-8.** To a solution of *dl*-**7** (88 mg, 0.13 mmol) and Et3N (0.15 mL, 1.08 mmol) in CCl4 (10 mL) was added dropwise a solution of Br2 (0.157 M CCl4 solution, 0.86 mL, 0.14 mmol) at 0 _C and the reaction mixture was stirred at 0 _C for 30 min. The resulting precipitates were filtered off with Celite® and the filtrate was concentrated in vacuo. Purification by FCC (SiO2, hexane-Et2O(3:1)), and by GPLC (toluene) afforded 3,7-bis(phenylthio)-2,2,6,6-tetrakis(trifluoromethyl)-1,5-dioxa-44-selenaspiro[3.3]heptane (*trans-trans*-**8**)(26 mg, 30%). A similar reaction using *meso*-**7** (314 mg, 0.48 mmol) afforded *trans-cis*-**8** (154 mg, 49%). *trans-trans*-**8**: colorless plates (hexane-Et2O); mp 93.5–108.4 _C (dec); 1H NMR (CDCl3, 270 MHz) 6.23 (s, 2H, SeC*H*), 7.30–7.44 (m, 6H), 7.56 (dd, 3*J* = 6.3 Hz, 4*J* = 1.6 Hz, 4H); 1H NMR (C6D6, 500 MHz) 6.35 (s, 2H, SeC*H*), 6.86–6.95 (m, 6H), 7.43–7.46 (m, 4H); 13C{1H} NMR (C6D6, 126 MHz) 82.07 (sept, 2*J*CF = 31 Hz, *C*(CF3)2), 88.07 (s, Se*C*H), 122.63 (q, 1*J*CF = 287 Hz, *C*F3), 123.03 (q, 1*J*CF = 288 Hz, *C*F3), 129.77 (s), 130.35 (s), 132.34 (s), 134.67 (s); 19F NMR (CDCl3, 254 MHz) –74.1 (q, 4*J*FF = 8.2 Hz, 6F), –78.3 (q, 4*J*FF = 8.2 Hz, 6F); 19F NMR (C6D6, 254 MHz) –74.0 (q, 4*J*FF = 8.3 Hz, 6F), –78.7 (q, 4*J*FF = 8.3 Hz, 6F); 77Se NMR (CDCl3, 51.5 MHz) 835.3 (m). Anal. Calcd for C20H12F12O2S2Se: C, 36.65; H, 1.85. Found: C, 36.83; H, 1.96. HRMS (70 eV) *m/z* calcd for C20H12F12O2S280Se 655.9252, found 655.9263. *trans-cis*-**8**: colorless plates (hexane-Et2O); mp 105.0–106.2 _C (dec); 1H NMR (CDCl3, 270 MHz) 6.59 (s, 1H, SeC*H*), 6.63 (s, 1H, SeC*H*), 7.34–7.45 (m, 6H), 7.51–7.61 (m, 4H); 1H NMR (C6D6, 500 MHz) 6.27 (s, 2*J*HSe = 37 Hz, 1H, SeC*H*), 6.82 (s, 1H, SeC*H*), 6.84–6.98 (m, 6H), 7.45–7.48 (m, 2H), 7.51–7.55 (m, 2H); 13C{1H} NMR (C6D6, 126 MHz) 82.83 (s, Se*C*H), 83.36 (sept, 2*J*CF = 29 Hz, *C*(CF3)2), 84.33 (sept, 2*J*CF = 31 Hz, *C*(CF3)2), 87.84 (s, Se*C*H), 122.14 (q, 1*J*CF = 288 Hz, *C*F3), 123.43 (q, 1*J*CF = 288 Hz, *C*F3), 123.67 (q2, 1*J*CF = 289 Hz, *C*F3), 129.83 (s), 130.03 (s), 130.13 (s), 130.37 (s), 131.83 (s), 132.28 (s), 134.42 (s2); 19F NMR (C6D6, 254 MHz) –73.0~–73.2 (m, 6F), –73.7 (q, 4*J*FF = 8.6 Hz, 3F), –78.2 (q, 4*J*FF = 9.1 Hz, 3F); 77Se NMR (CDCl3, 95 MHz) 882.0 (m). Anal. Calcd for C20H12F12O2S2Se: C, 36.65; H, 1.85. Found: C, 36.50; H, 2.01. HRMS (70 eV) *m/z* calcd for C20H12F12O2S280Se 655.9252, found 655.9280.

**Synthesis of 3,7-Diphenyl-2,2,6,6-tetrakis(trifluoromethyl)-1,5-dioxa-44-selenaspiro[3.3]heptanes (*trans-trans*-9)**

**Preparation of 2-Benzyl-1,1,1,3,3,3-hexafluoro-2-propanol (13).** To an ether solution of PhCH2MgCl which was prepared from PhCH2Cl (11.5 mL, 100 mmol) and magnesium turnings (24.3 g, 100 mmol) was added at –78 _C under dry nitrogen excess of HFA, which was freshly prepared by adding its trihydrate (20.7 mL, 150 mmol) to concentrated sulfuric acid at 140 _C. The solution was stirred for 30 min, treated with aqueous NH4Cl, and extracted with CH2Cl2. The extracts were dried over anhydrous MgSO4. After removal of the solvent under reduced pressure the residue was subjected to WCC (SiO2, hexane-CH2Cl2 (1:1)) to afford **13** (17.1 g, 66%). **13**: colorless viscous oil; 1H NMR (CDCl3, 500 MHz) 2.73 (s, 1H, O*H*), 3.28 (s, 2H, C*H*2), 7.27–7.30 (m, 2H), 7.35–7.40 (m, 3H); 13C{1H} NMR (CDCl3, 126 MHz) 35.46 (s, *C*H2), 75.77 (sept, 2*J*CF = 29 Hz, *C*(CF3)2), 122.97 (q, 1*J*CF = 288 Hz, *C*F3), 128.34 (s), 128.92 (s), 130.69 (s), 131.05 (s); 19F NMR (CDCl3, 254 MHz) –76.6 (s). HRMS (70 eV) *m/z* calcd for C10H8F6O 258.0479, found 258.0453.

**Preparation of 2-(-Bromobenzyl)-1,1,1,3,3,3-hexafluoro-2-propanol (14).** A dispersion of **13** (1.82 g, 7.05 mmol) and *N*-bromosuccinimide (NBS) (1.38 g, 7.75 mmol) in CCl4 (14 mL) was irradiated with a 400 W medium pressure mercury lamp through a Pyrex and water for 16 h. The resulting precipitates were filtered off with Celite® and the filtrate was concentrated in vacuo. The residue was subjected to GPLC (chloroform) and WCC (SiO2, hexane-CH2Cl2 (1:1)) to afford an inseparable 37:8 mixture of **14** and 2-(3-bromobenzyl)-1,1,1,3,3,3-hexafluoro-2-propanol (**14**)(1.07 g, 45%). **14**: 1H NMR (CDCl3, 500 MHz) 3.66 (s, 1H, O*H*), 5.37 (s, 1H, C*H*Br), 7.33–7.38 (m, 3H), 7.48–7.50 (m, 2H); 13C{1H} NMR (CDCl3, 126 MHz) 50.15 (s, *C*HBr), 78.24 (sept, 2*J*CF = 28 Hz, *C*(CF3)2), 121.73 (q, 1*J*CF = 289 Hz, *C*F3), 122.00 (q, 1*J*CF = 290 Hz, *C*F3), 128.27 (s), 129.61 (s), 129.82 (s), 134.86 (s); 19F NMR (CDCl3, 254 MHz) –70.7 (qd, 4*J*FF = 10 Hz, 4*J*FH = 3 Hz, 3F), –71.8 (q, 4*J*FF = 10 Hz, 3F). HRMS (70 eV) *m/z* calcd for C10H779BrF6O 335.9584, found 335.9591. **15**: colorless viscous oil; 1H NMR (CDCl3, 500 MHz) 2.92 (s, 1H, O*H*), 3.22 (s, 2H, C*H*2), 7.21-7.24 (m, 2H), 7.46 (s, 1H), 7.46–7.50 (m, 1H); 13C{1H} NMR (CDCl3, 126 MHz) 35.05 (s, *C*H2), 76.04 (sept, 2*J*CF = 29 Hz, *C*(CF3)2), 122.63 (s), 122.78 (q, 1*J*CF = 287 Hz, *C*F3), 129.62 (s), 130.12 (s), 131.31 (s), 133.30 (s), 133.94 (s); 19F NMR (CDCl3, 254 MHz) –76.4 (s). HRMS (70 eV) *m/z* calcd for C10H779BrF6O 335.9584, found 335.9587.

**Preparation of Bis[3,3,3-trifluoro-2-hydroxy-1-phenyl-2-(trifluoromethyl)-propyl] Selenides (*dl*-16 and *meso*-16).** To a THF suspension (5 mL) of Na2Se (1.93 mmol) was added a THF solution of a 87:13 mixture of **14** and **15** (1.56 g, 4.02 mmol for **14**) at 25 _C and the reaction mixture was stirred for 12 h. The resulting precipitates were filtered off with Celite® and the filtrate was concentrated in vacuo. The residue was subjected to DCC (SiO2, hexane-CH2Cl2 (1:5)) to afford a 56:44 mixture of *dl*-**16** and *meso*-**16** (934 mg, 81%). Further separation by FCC (SiO2, CH2Cl2) gave less polar *dl*-**16** and *meso*-**16**. *dl*-**16**: colorless solid; 1H NMR (CDCl3, 500 MHz) 3.35 (br s, 2H, O*H*), 3.93 (s, 2H, SeC*H*), 7.27–7.47 (m, 10H); 13C{1H} NMR (CDCl3, 126 MHz) 47.40 (s, Se*C*H), 78.06 (sept, 2*J*CF = 29 Hz, *C*(CF3)2), 122.00 (q, 1*J*CF = 289 Hz, *C*F3), 122.32 (q, 1*J*CF = 289 Hz, *C*F3), 128.52 (s), 129.34 (s), 131.01 (s), 133.57 (s); 19F NMR (CDCl3, 254 MHz) –71.7 (q, 4*J*FF = 9.9 Hz, 6F), –72.7 (q, 4*J*FF = 9.9 Hz, 6F); 77Se NMR (CDCl3, 51.5 MHz) 476.4 (m). HRMS (70 eV) *m/z* calcd for C20H14F12O280Se 593.9967, found 593.9956. *meso*-**16**: colorless solid; 1H NMR (CDCl3, 500 MHz) 3.97 (br s, 2H, O*H*), 4.37 (s, 2H, SeC*H*), 7.02 (d, 3*J* = 7.6 Hz, 4H, *o*-*H*), 7.13 (t, 3*J* = 7.6 Hz, 4H, *m*-*H*), 7.21 (t, 3*J* = 7.6 Hz, 2H, *p*-*H*); 13C{1H} NMR (CDCl3, 126 MHz) 49.19 (s, Se*C*H), 78.25 (sept, 2*J*CF = 28 Hz, *C*(CF3)2), 122.21 (q, 1*J*CF = 289 Hz, *C*F3), 122.48 (q, 1*J*CF = 289 Hz, *C*F3), 128.12 (s), 128.58 (s), 130.43 (s), 133.88 (s); 19F NMR (CDCl3, 254 MHz) –71.0 (q, 4*J*FF = 9.8 Hz, 6F), –72.6 (q, 4*J*FF = 9.8 Hz, 6F); 77Se NMR (CDCl3, 51.5 MHz) 439.7 (m). HRMS (70 eV) *m/z* calcd for C20H14F12O280Se 593.9967, found 593.9949.

**Synthesis of *trans-trans*-9.** To a solution of *dl*-**16** (73 mg, 0.123 mmol) and Et3N (0.034 mL, 0.244 mmol) in CCl4 (10 mL) was added dropwise a solution of Br2 (0.174 M CCl4 solution, 0.71 mL, 0.123 mmol) at 0 _C and the reaction mixture was stirred at 0 _C for 30 min. The resulting precipitates were filtered off with Celite® and the filtrate was concentrated in vacuo. Purification by FCC (SiO2, hexane-CH2Cl2 (1:1)) and by GPLC (toluene) afforded 3,7-diphenyl-2,2,6,6-tetrakis(trifluoromethyl)-1,5-dioxa-44-selenaspiro[3.3]heptane (*trans-trans*-**9**)(63 mg, 87%). *trans-trans*-**9**: colorless plates (hexane-Et2O); mp 178.2–179.8 _C (dec); 1H NMR (CDCl3, 500 MHz) 6.86 (s, 2H, SeC*H*), 7.40 (d, 3*J* = 7.2 Hz, 4H), 7.45–7.53 (m, 6H); 13C{1H} NMR (CDCl3, 126 MHz) 80.62 (sept, 2*J*CF = 31 Hz, *C*(CF3)2), 81.43 (s, 1*J*CSe = 23 Hz, Se*C*H), 122.00 (q, 1*J*CF = 288 Hz, *C*F3), 122.45 (q, 1*J*CF = 287 Hz, *C*F3), 126.95 (s), 129.44 (s), 129.97 (s), 130.33 (s); 19F NMR (CDCl3, 254 MHz) –73.4 (q, 4*J*FF = 9.0 Hz, 6F), –78.2 (q, 4*J*FF = 9.0 Hz, 6F); 77Se NMR (CDCl3, 51.5 MHz) 723.1 (s). Anal. Calcd for C20H12F12O2Se·1/2H2O: C, 40.02; H, 2.18. Found: C, 40.05; H, 2.40. HRMS (70 eV) *m/z* calcd for C20H12F12O280Se 591.9811, found 591.9816.
